# Supplementary material for: Parallel control of mechanosensory hair cell orientation by the PCP and Wnt pathways
Source: bioRxiv or medRxiv preprint supplement (doi:10.1101/527937), 2019-01-23

# Figure Supplementary 1 for Figure 1

*wnt11f1* is only expressed by prim1-derived neuromasts

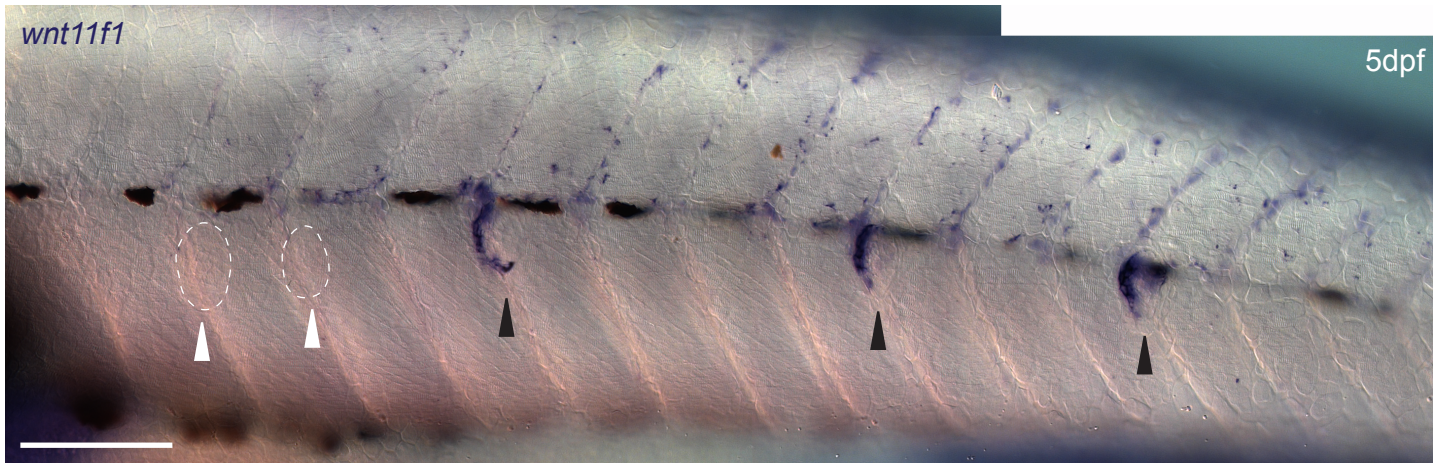

# Figure Supplementary 2 for Figure 1

Analysis of hair cell orientation with respect to the nearest neighbor  
(do hair cells show relative orientation with respect to each other?)

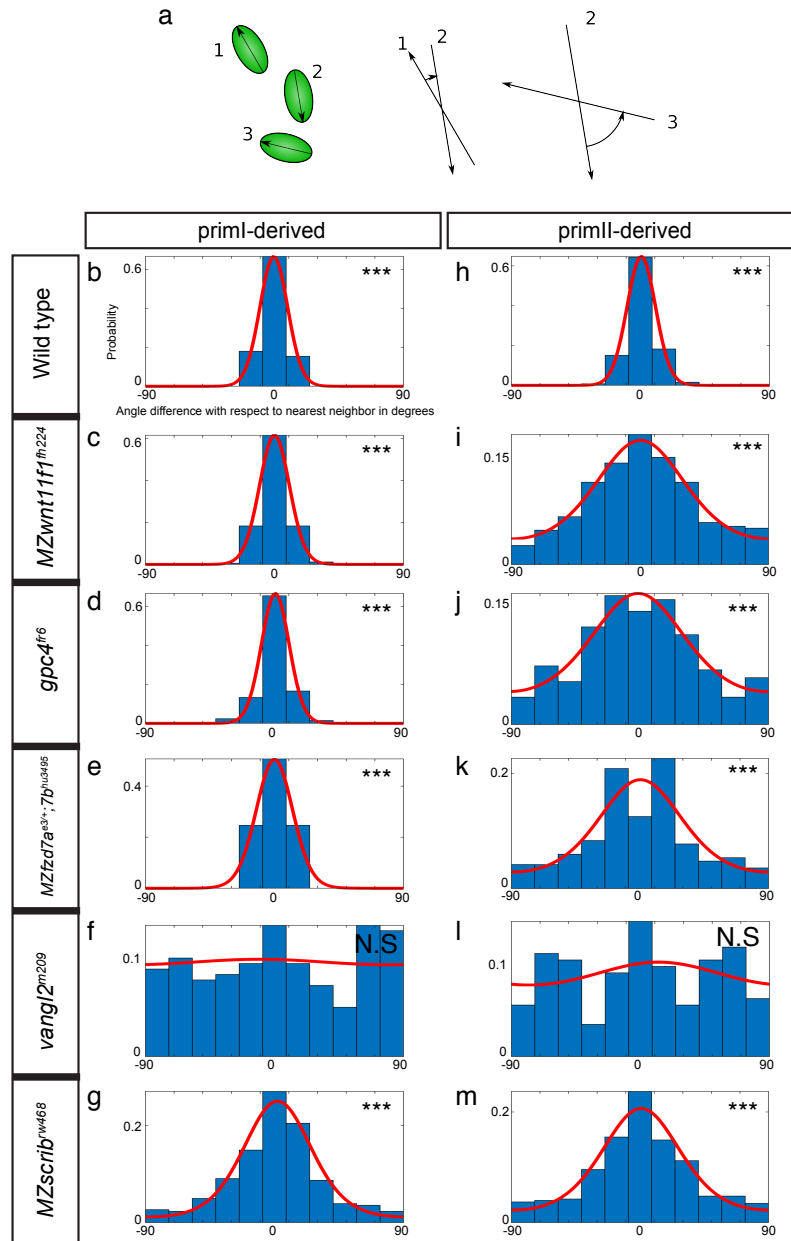

## Hair cell orientation in double mutants

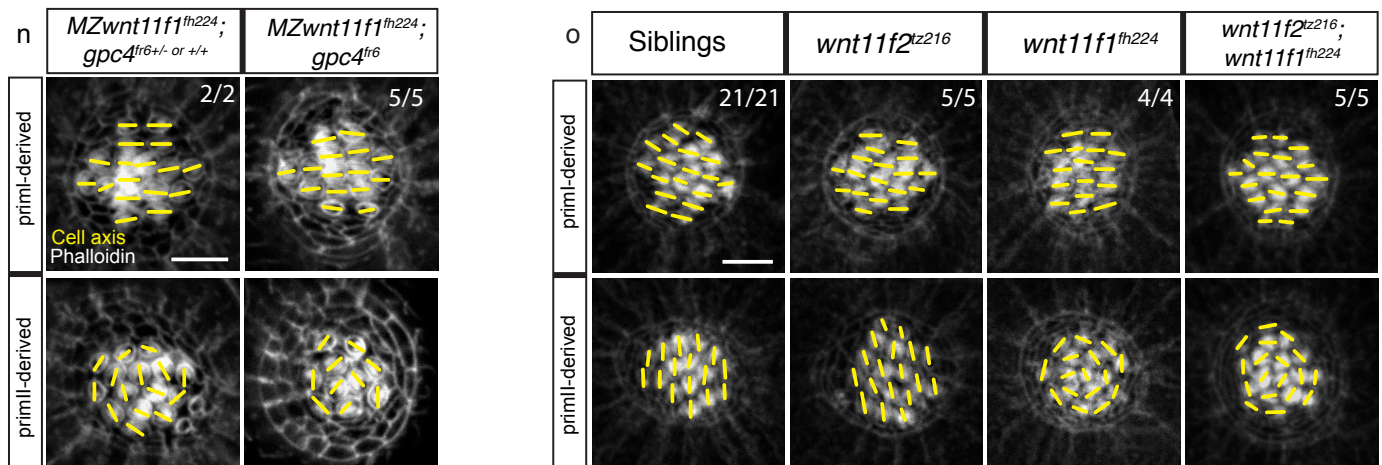

# Figure Supplementary 3 for Figure 2

Analysis of angle difference between a given hair cell's orientation and the nearest fitting ellipse (concentricity)

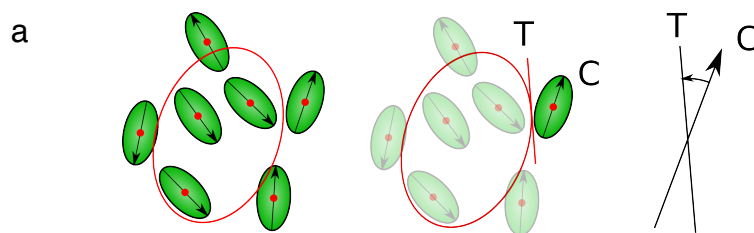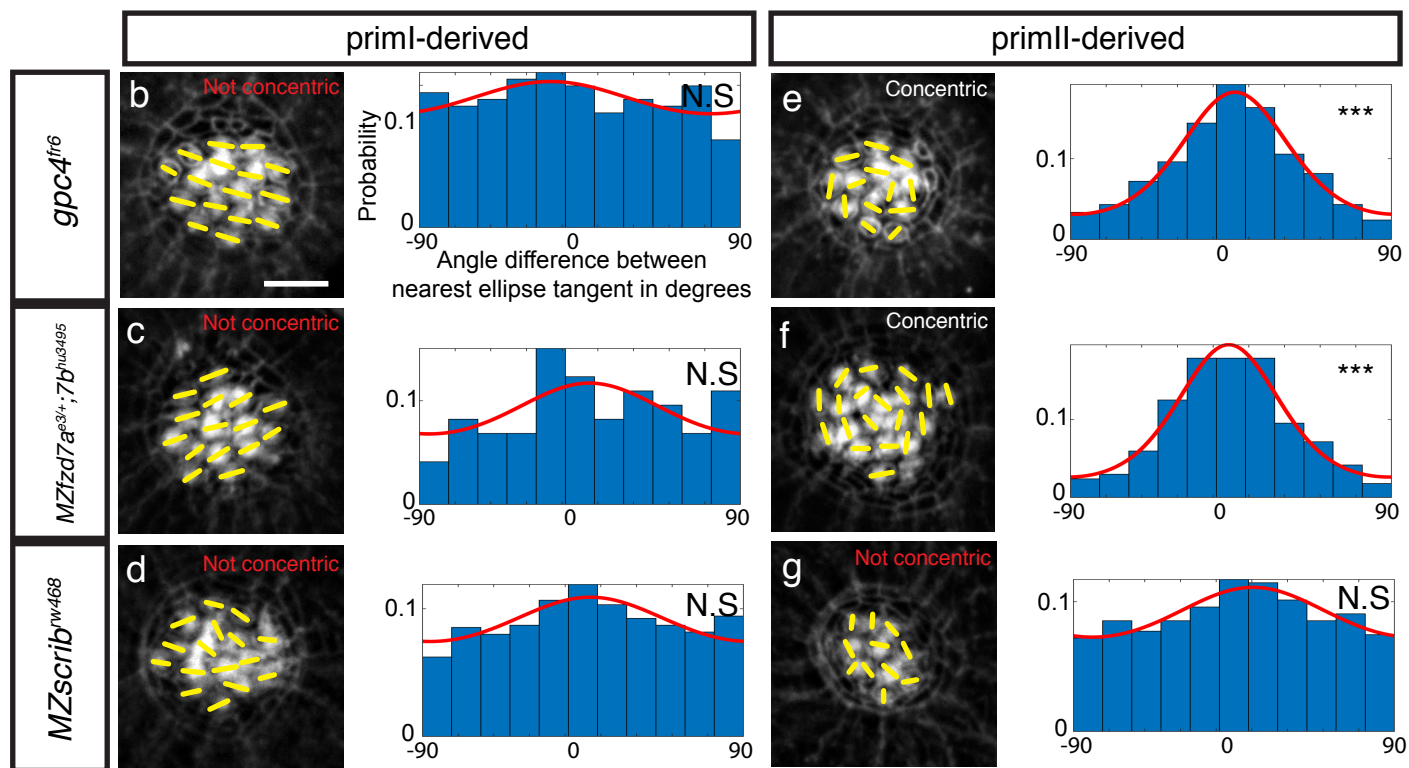

# Figure Supplementary 4 for Figure 2

Analysis of hair cell orientation with respect to the nearest neighbor

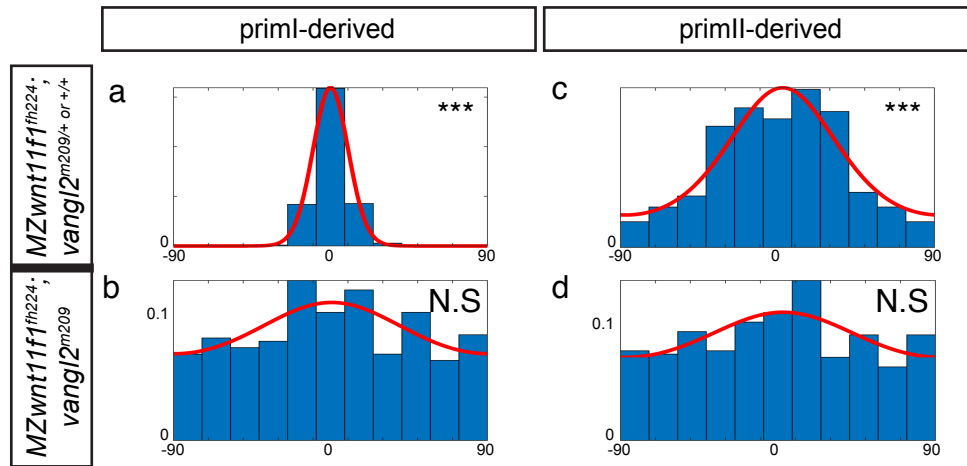



# Figure Supplementary 5 for Figure 3

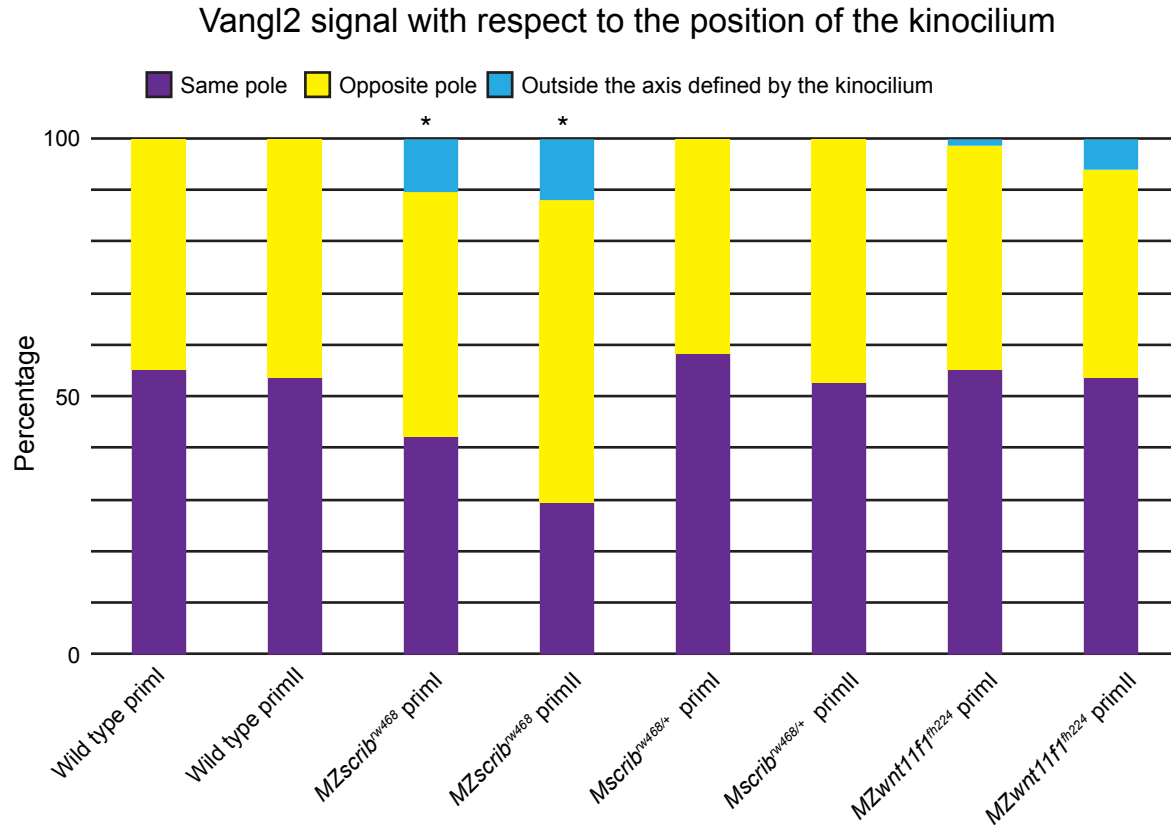

# Figure Supplementary 6 for Figure 3

Vangl2 localization is absent in *vangl2*<sup>m209</sup> mutants

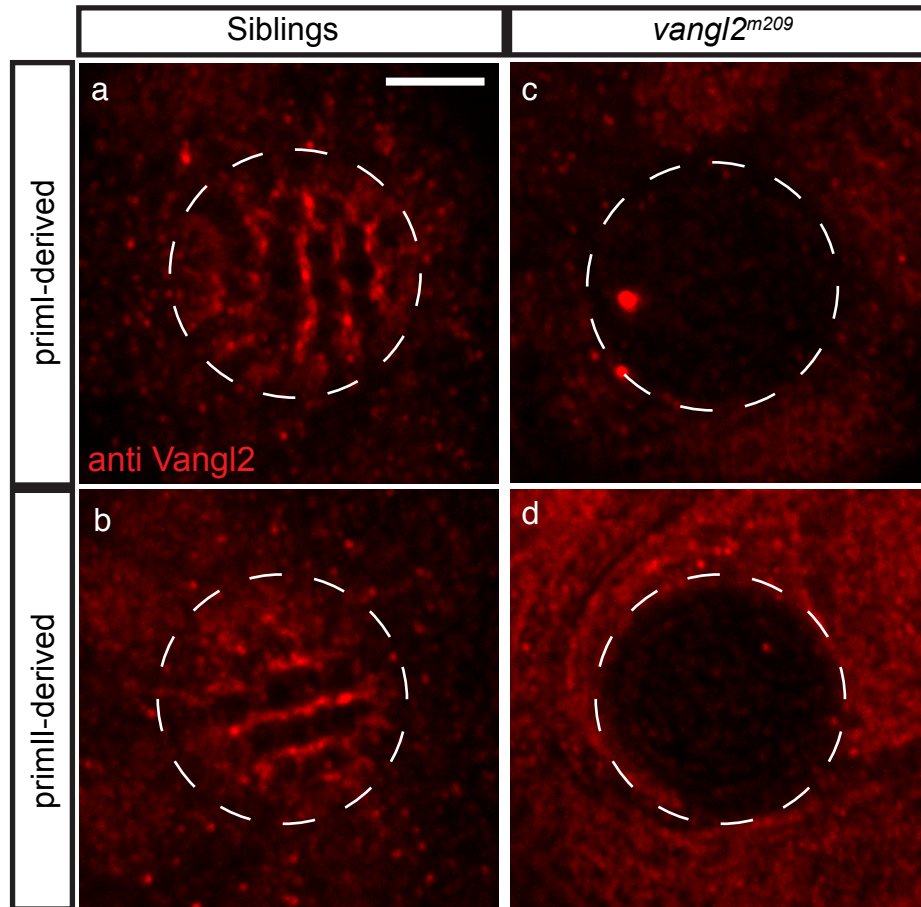

# Figure Supplementary 7 for Figure 4

Analyses of cell behaviors of hair cell precursors during development show no differences between Wild type and *MZwnt11f1* mutants

● Hair cell precursor   
 ● Hair cells produced from precursor division   
 ● Hair cells produced from precursor division   
 Rearrangement

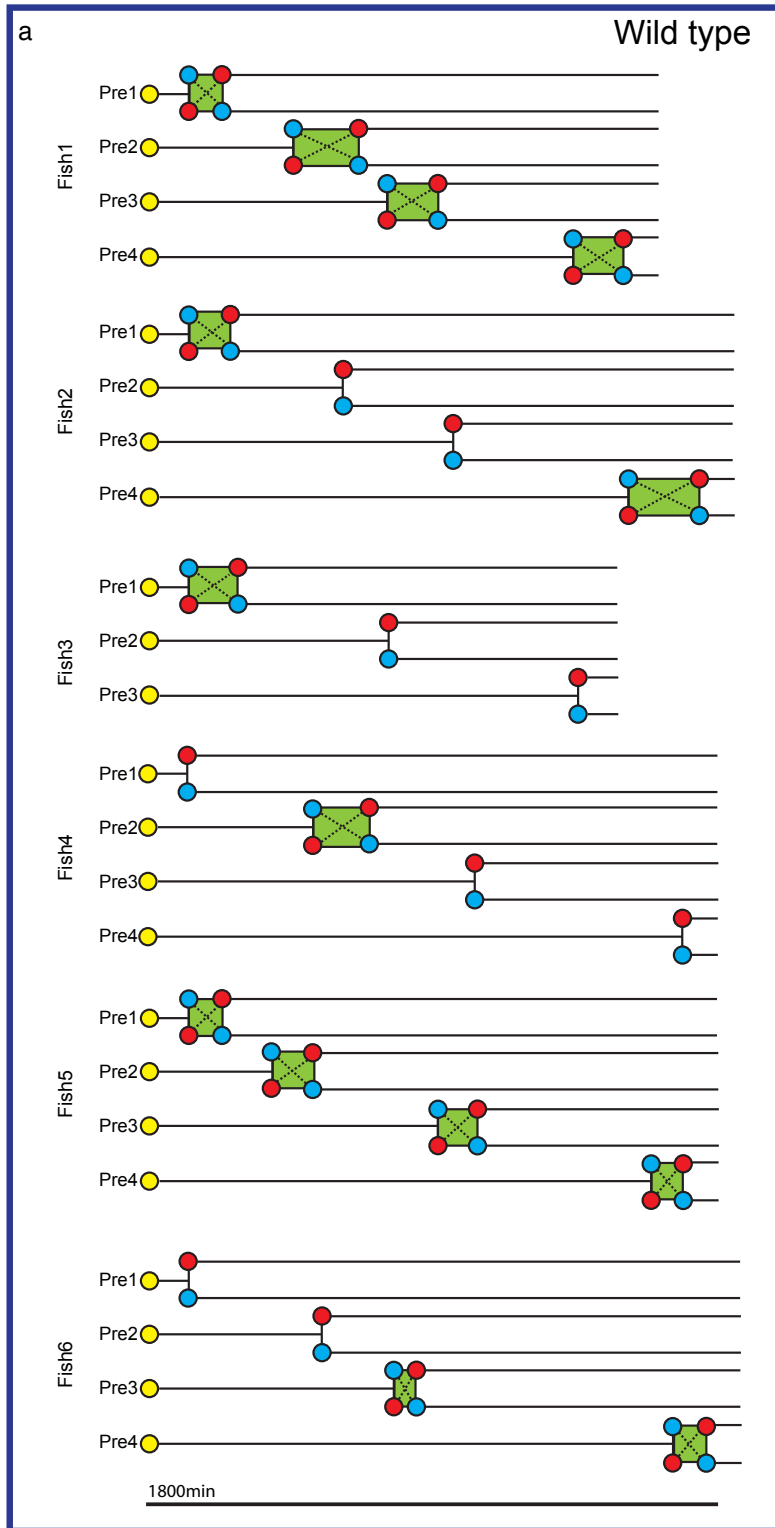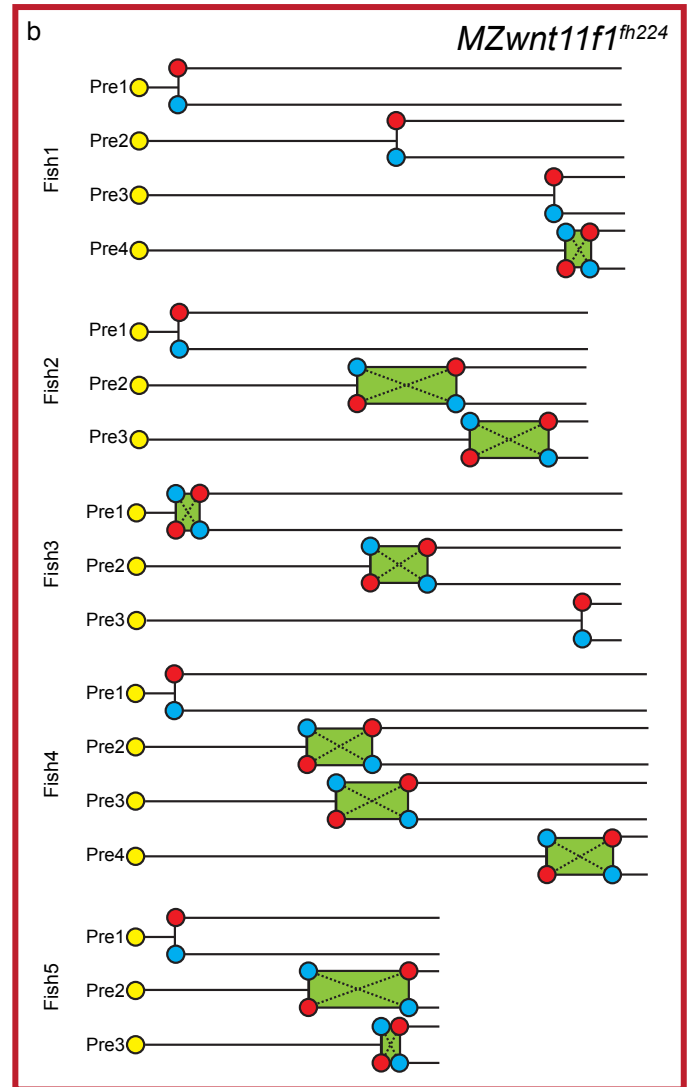

**e Division angle with respect to the radius (XY)**

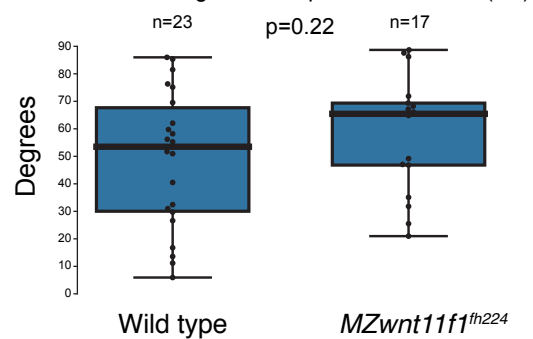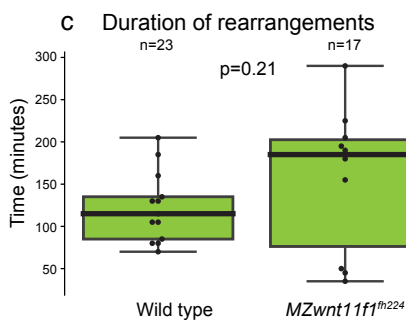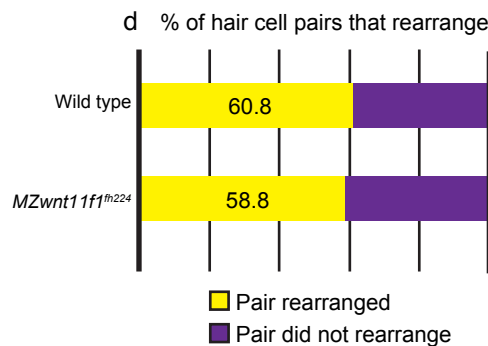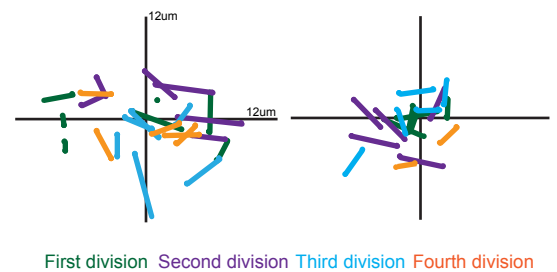

# Figure Supplementary 8 for Figure 4

Angle comparison with nearest neighbor of hair cells in primII-derived neuromasts

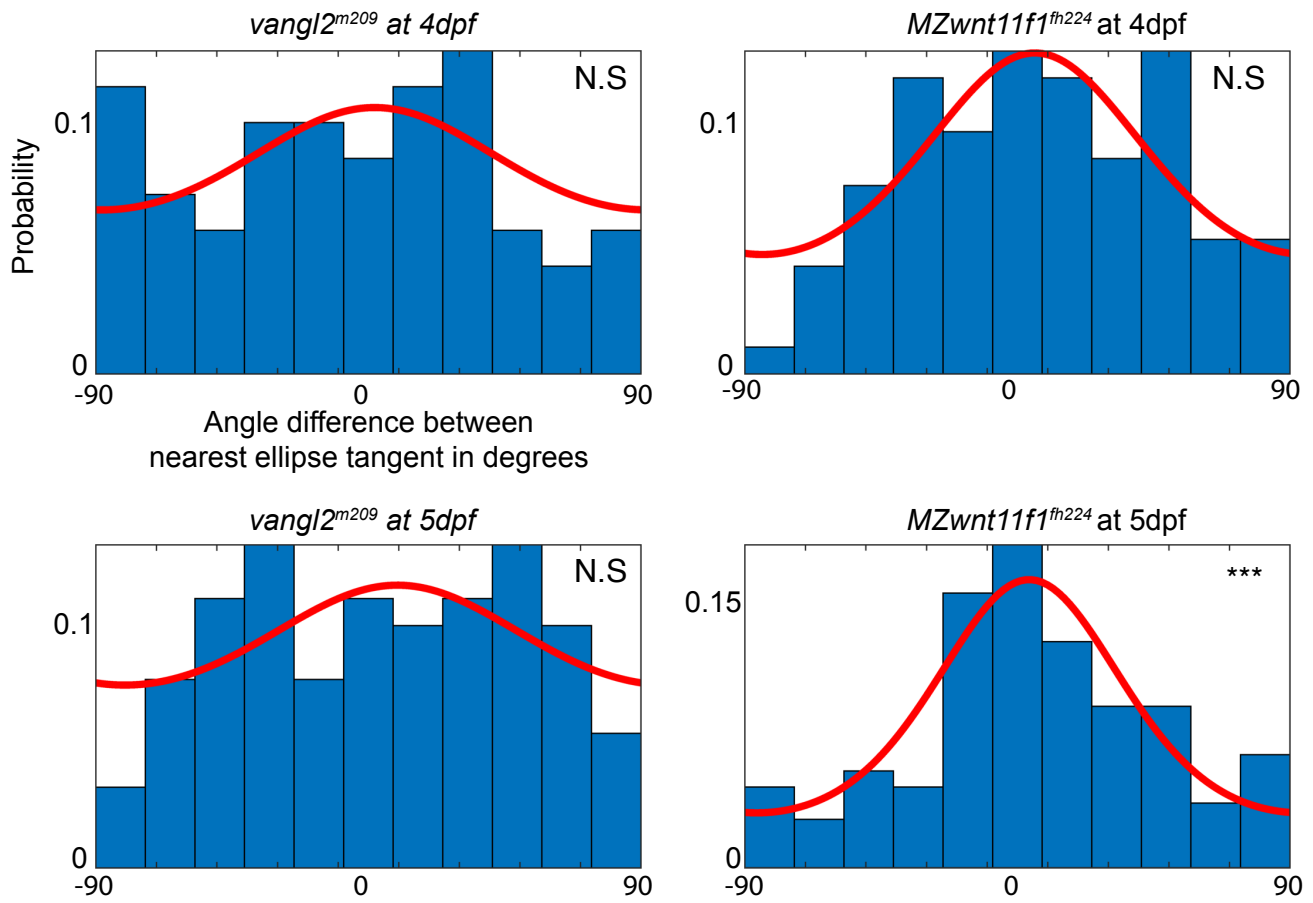

# Figure Supplementary 9 for Figure 5

Pipeline for Segmentation of Phalloidin images for Support Cell orientation analysis

**Step 1**

Phalloidin staining

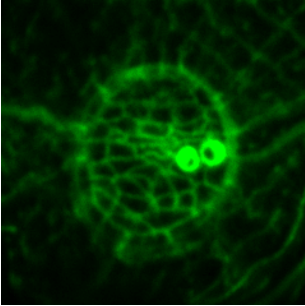

**Step 2**

Custom sharpening

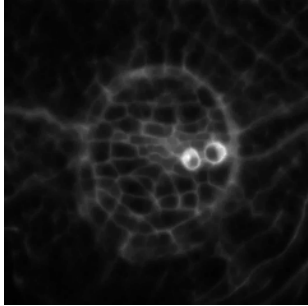

**Step 3**

MorphoJ segmentation

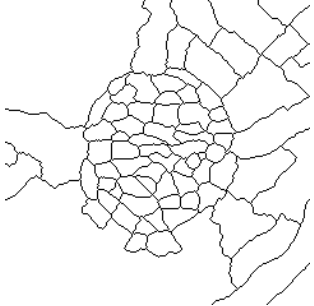

**Step 4**

Image Clean-up

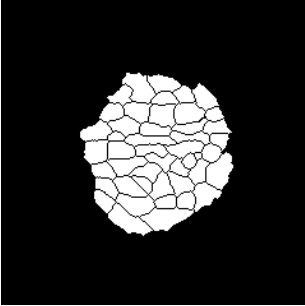

**Step 5**

Fitting ellipse

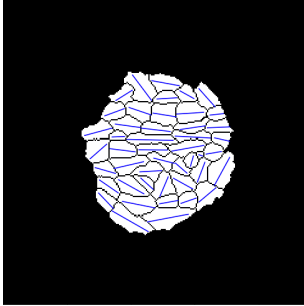

(3h after Neomycin)

# Figure Supplementary 10 for Figure 6

*wnt11f1* is expressed in the muscle

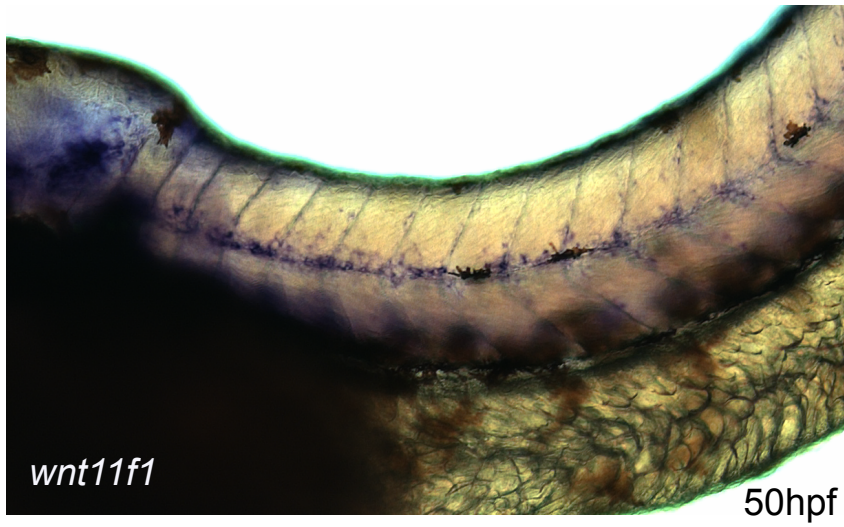

*fzd7a*

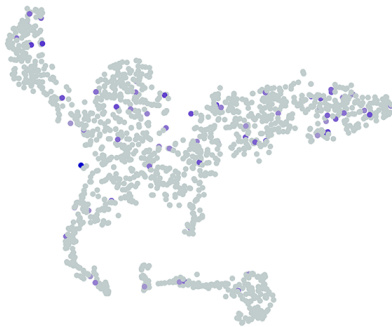

*gpc4*

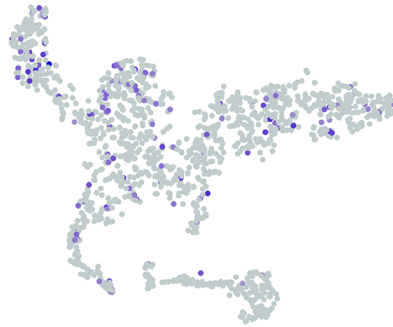

*scrib*

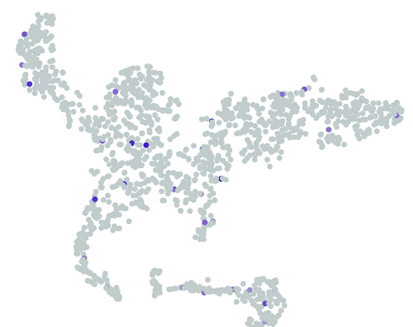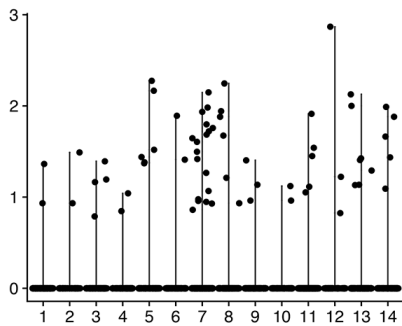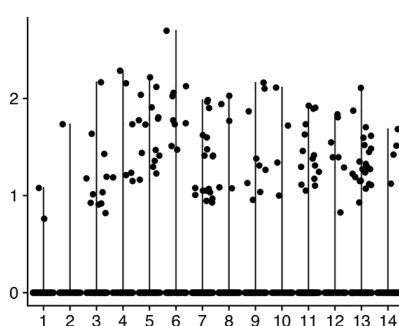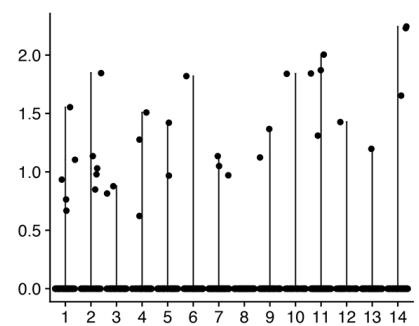



# Figure Supplementary 11 for Figure 6

Neuromasts derived from the Occipital prim and primD show a hair cell phenotype in *MZwnt11f1* mutants

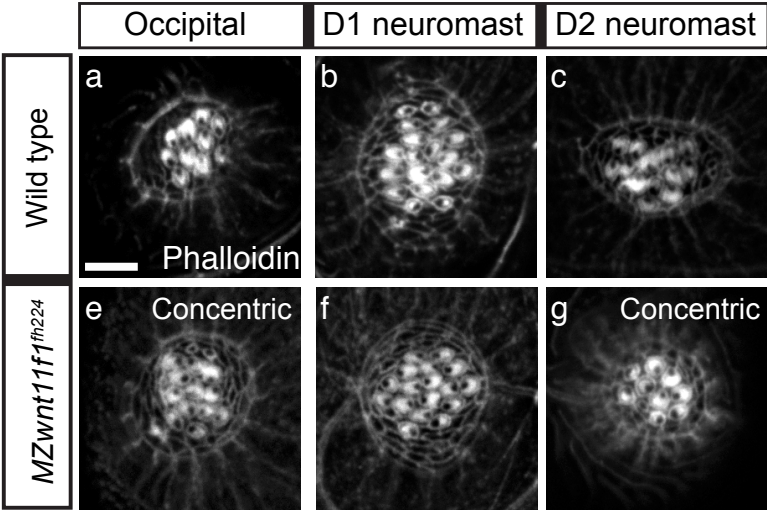

# Figure Supplementary 12

Distribution, but not ratio of expression, of Emx+ hair cells is affected in primII-derived neuromasts of *MZwnt11f1* mutants

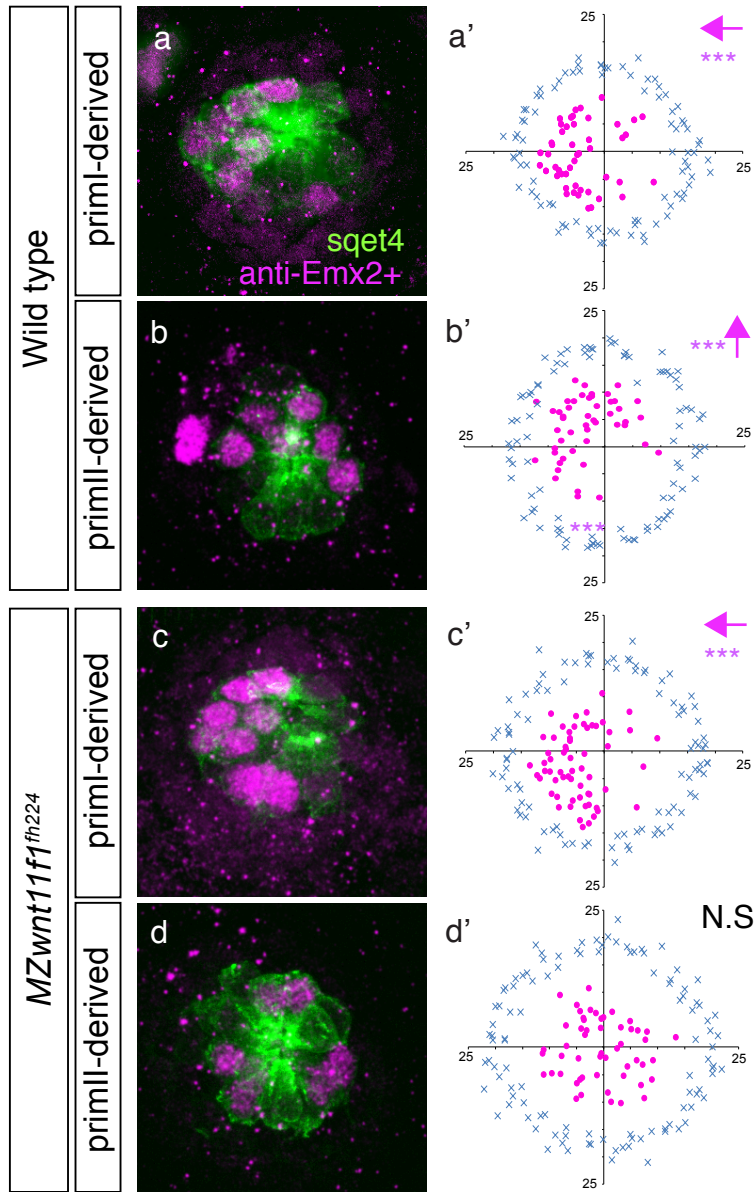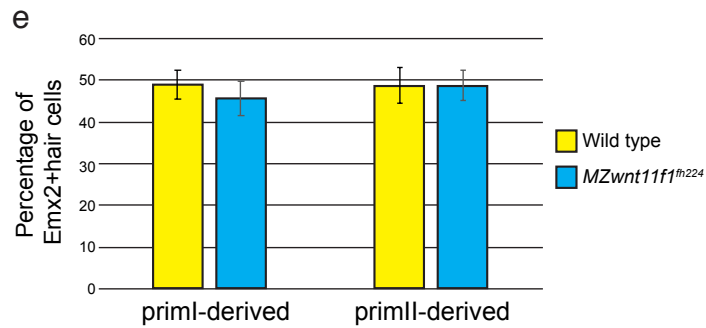

Supplement: Supplementary file [file media-1.pdf]
